# Supplementary material
Source: Royal Society of Chemistry journal article supplement (doi:10.1039/d6ta00692b)
Supplement: d6ta00692b1.xlsx [file d6ta00692b1.xlsx]

## Sheet: Sheet1
Metal prepolymer ratio	Non-metallic propolymer ratio	Pyrolysis Temperature (℃)	Pyrolysis Time (h)	Temperature Rising Rate (℃ min-1)	Seconde Pyrolysis	Acid Wash	Co Content (wt. %)	Fe Content (wt. %)	P Content (at. %)	O Content (at. %)	S Content (at. %)	N Content (at. %)	Content of Pyridinic-N Species (at. %)	Content of Pyrrolic-N Species (at. %)	Content of Graphitic-N Species (at. %)	Content of Oxidized-N Species (at. %)	Raman ID/IG Ratio	BET Surface Area (m2 g-1)	Micropore Ratio	Mesopore Ratio	Catalyst Loading on RDE/RRDE(mg cm-2)	Rotating Speed (rpm)	Linear voltammetry scan scan speed (mV s-1)	Half-Wave potential	HW_0.78	HW_0.80	HW_0.82	石墨N_0.01	*100	石墨N_0.02
0.34497	0.75	900	1	1	0	0	0	0	0.018	0.0390362	0	0.1185	0.0057828	0.00309285	0.10902	0.0009006	0.915393	467	1.5838	7.74222	0.15	1600	10	0.855	1	1	1	1	2	1
0.41	0	700	2	1	0	1	0	0	0	0.0984455	0	0.0674	0.027971	0.013817	0.0143832	0.0112288	1.1	525	0.293312	8.42475	0.306	1600	5	0.87	1	1	1	1	2	0
0.51	0	900	2	1	0	1	0	0.0077	0	0.0702	0.023	0.0706	0.0243782	0.0227191	0.0173888	0.00611396	1.25	724.38	0.710394	9.44967	0.095	1600	5	0.88	1	1	1	1	2	0
0.007	0.168452	900	2	2	0	0	0	0	0	0.0923647	0	0.075	0.02367	0.0091575	0.03654	0.005625	0.99262	298.84	0.301967	3.76646	0.1	1600	10	0.86	1	1	1	1	2	1
0.02	0.3	900	2	2	0	0	0	0.006	0	0.0577	0	0.0494	0.0145878	0.0108334	0.0101171	0.0138616	1.31	829.4	1.24794	5.26	0.31	1600	10	0.835	1	1	1	1	2	0
0.03	0.5	900	3	2	0	1	0.0257	0	0	0.0397	0	0.0483	0.017871	0.023184	0.006279	0.000966	1.13	618.12	1.72279	3.935	0.196	1600	10	0.86	1	1	1	0	0	0
0.172429	0.29	900	2	2	0	0	0	0	0	0.0511	0	0.0673	0.0179354	0.0118044	0.0319608	0.00559936	1.014	152.19	1.82622	3.5	1	1600	20	0.82	1	1	1	1	2	1
0.18	0.2	500	2	2	0	0	0	0.026	0	0.225	0.09	0.092	0.0207	0.014996	0.023736	0.032568	1.08	124.08	0.619853	11.0418	0.1	1600	10	0.8	1	1	0	1	2	1
0.279	0.472	900	2	2	0	0	0	0.015	0	0.0723378	0	0.031	0.0143933	0.0088567	0.003317	0.004433	1.07	189.1	0.54	3.8	0.2	1600	5	0.74	0	0	0	0	0	0
0.29	0.52	800	0.5	2	0	0	0.074	0	0	0.0556892	0	0.07	0.02121	0.01722	0.01218	0.01939	0.83	162.8	1.94	5.5	0.204	1600	10	0.85	1	1	1	1	2	0
0.41	0.4	900	2	2	0	0	0	0	0	0.0508	0	0.0206	0.00539926	0.00561762	0.00689894	0.00259972	1.31	1409.87	1.72952	11.6293	0.23	1600	10	0.825	1	1	1	0	0	0
0.46	0	800	2	2	0	1	0	0	0	0.104941	0	0.0755	0.0187542	0.0188297	0.0188826	0.019026	1.075	401.53	0.177614	6.85897	0.306	1600	10	0.82	1	1	1	1	2	0
0.64	0.17	800	2	2	0	0	0.0166	0	0	0.0835	0	0.0272	0.00823344	0.0107386	0.00528768	0.0029376	0.95	114.32	0.295327	11.6262	0.14	1600	10	0.83	1	1	1	0	0	0
0.33	0.626002	800	2	2.5	0	0	0	0	0	0.0758295	0.0023	0.012	0.003978	0.003516	0	0	1.0003	884.9	0.4	9.37821	0.1	1600	10	0.785	1	0	0	0	0	0
0.653296	2	850	2	3	0	1	0	0	0	0.0516	0	0.0501	0.0173597	0.0152154	0.011513	0.0061623	0.284	1260	1.705	7.66551	0.3	1600	10	0.84	1	1	1	1	2	0
0.683	0.5	800	2	3	0	0	0.0123	0.0086	0	0.0847	0	0.0986	0.0439756	0.0230034	0.0143956	0.0172254	1.45	809.23	0.617587	10.6146	0.2	1600	5	0.87	1	1	1	1	2	0
0.19	0.25	900	3	3.15578	0	1	0	0	0	0.0641	0	0.0588	0.025284	0.012348	0.01764	0.004116	1.04118	604.14	0.643688	5.55316	0.306	1600	10	0.8	1	1	0	1	2	0
0.200423	0.319776	600	2	3.69105	0	0	0	0	0	0.100469	0	0.088	0.032296	0.022528	0.022616	0.010472	1.07446	699	0.244362	6.30866	0.0533333	1300	10	1.06	1	1	1	1	2	1
0.344408	0.25	800	2	3.96617	0	0	0	0	0	0.0921739	0	0.081	0.021384	0.040338	0.005751	0.013527	1.03953	260.25	0	7.40792	0.37	1600	10	0.741	0	0	0	0	0	0
1.11388	0.978536	800	1	4.0058	0	0	0	0	0	0.043	0	0.074	0.015096	0.015466	0.026492	0.016946	0.642229	630	1.2	7	0.1	1600	10	0.844	1	1	1	1	2	1
0.0548692	0.696096	800	3	4.05179	0	0	0	0	0	0.0401555	0	0.053	0.0137853	0.0127995	0.0211788	0.0052364	1.5	1390	1.84544	9.15375	0.2	1600	10	0.788	1	0	0	1	2	1
0.30891	0.25	800	2	4.08422	0	0	0	0	0	0.104383	0	0.326	0.06683	0.100082	0.031296	0.10921	1.05612	400	0	8.1762	0.2	1600	10	0.72	0	0	0	1	2	1
0.38889	0.34	800	2	4.45786	0	0	0	0	0	0.0930991	0	0.018	0.0063	0.00198	0.00666	0.0018	0.933049	600	0	7.13498	0.158436	1600	10	0.87	1	1	1	0	0	0
1.13	1.5	800	2	4.56637	0	1	0	0.003	0	0.06	0	0.021	0.0065688	0.0047754	0.0079884	0.001554	0.95	302.5	1.00049	3	0.3	1600	10	0.89	1	1	1	0	0	0
0.66	0.4	800	2	4.69616	1	0	0	0.07	0	0.056	0	0.04	0.016756	0.005052	0.011948	0.006244	0.97	1246.35	2.584	12.99	0.2	1600	10	0.856	1	1	1	1	2	0
0.478975	0.52	700	2.08866	4.74524	0	0	0	0	0	0.0897237	0	0.006	0.0057	0	0.0003	0	0.873614	400	0.311529	12.4084	0.02	1600	10	0.91	1	1	1	0	0	0
0.237231	0.5	900	2	4.89078	0	0	0	0	0	0.073	0	0.035	0.01239	0.01925	0.00336	0	0.976008	652	0	7.92826	0.2	1600	10	0.77	0	0	0	0	0	0
0.475	0.573	900	2	4.99002	0	0	0.0165	0.088	0	0.0223	0	0.018	0.00396	0.00342	0.00774	0.00288	0	350	0.47	14	0.4	1600	5	0.88	1	1	1	0	0	0
0	0.1	900	2	5	0	1	0	0	0	0.0474	0	0.0339	0.0126244	0	0.0212756	0	0	947.2	1.29342	7.54259	0.91	1600	10	0.845	1	1	1	1	2	1
0	0.53	950	2	5	0	1	0	0	0.0221	0.0625463	0	0.0454	0.0089438	0.018219	0	0.0182735	1.26	943.5	0.656	10	0.31	1600	10	0.753	0	0	0	0	0	0
0	0.5	900	3	5	0	1	0	0	0	0.0159	0	0.0157	0.00625174	0.00627372	0.00201117	0.00116337	1.03	2980	2.5	5	0.228	900	10	0.75	0	0	0	0	0	0
0.0625	2	800	2	5	0	0	0	0	0	0.0305627	0	0.0247	0.0089908	0.0076323	0.0017784	0.0062985	1.12	276.7	1.63955	12.7419	1	1600	10	0.81	1	1	0	0	0	0
0.072	1.29637	500	4	5	0	0	0	0	0	0.0403636	0	0.0523	0.0145394	0.0152193	0.0085772	0.0139641	0	793.6	1.59156	15.1682	0.5	1600	5	0.863	1	1	1	0	0	0
0.173	0.7	900	3	5	0	0	0	0.0588	0	0.0625	0	0.0643	0.0120948	0.0190199	0.0171874	0.0159978	0.99	832	2.424	15	0.2785	1600	10	0.902	1	1	1	1	2	0
0.173788	0.5	1000	1	5	0	1	0	0	0	0.0387158	0	0.0066	0.00193578	0.00133584	0.00271326	0.00066	0.847015	472.098	1.33915	22.4493	1	1600	10	0.8	1	1	0	0	0	0
0.24	0	800	1	5	0	1	0	0	0.0022	0.0931	0	0.0414	0.0132025	0.00597402	0.0162495	0.00597402	1.522	243.9	0.338011	5.77763	0.1	1600	5	0.855	1	1	1	1	2	0
0.240656	0.0625	900	1	5	0	0	0	0	0	0.0928702	0	0.0657	0.0173	0.02	0.0284	0	1.14	615.2	0.183567	5.285	0.1	1600	5	0.98	1	1	1	1	2	1
0.269193	0.25	800	2	5	1	1	0	0	0	0.032	0	0.038	0.007068	0.00589	0.018202	0.00684	1.05	868.6	1.757	1.7	0.1	1600	10	0.78	1	0	0	1	2	0
0.280425	0.33	800	1	5	0	0	0	0	0	0.143	0	0.069	0.027117	0.008694	0.02622	0.006969	1.1	1123	0.4526	0.1846	0.65	1600	5	0.78	1	0	0	1	2	1
0.29	0.33	900	2	5	0	0	0	0	0.015	0.0861334	0	0.051	0.033966	0	0.000408	0.016626	1.15244	336.6	0.241649	6.33843	0.29	1600	10	0.92	1	1	1	0	0	0
0.303744	0.5	700	2	5	0	0	0	0	0	0.091734	0	0.0476	0.014	0.0014	0.0322	0	0.95	950.6	0.0956328	5.66728	0.04	1600	10	0.9	1	1	1	1	2	1
0.32	0.792	300	1	5	0	0	0.0331	0	0	0.0475	0	0.0587	0.0235681	0.0227991	0.00948005	0.00285282	1.28	188.6	1.99	24.31	0.25	1600	5	0.84	1	1	1	0	0	0
0.32074	0.73	800	1	5	0	1	0	0	0	0.0937912	0	0.023	0.013087	0.006601	0.003312	0	1.01956	1191	0.3	0.44	0.177	1600	5	0.71	0	0	0	0	0	0
0.33	0.373491	900	2	5	0	0	0	0	0	0.111282	0	0.0607	0.0150657	0.0151507	0.0152236	0.01526	1.17213	807.7	0	4.25896	0.5	1600	10	0.82	1	1	1	1	2	0
0.35797	0.5	900	2	5	0	0	0.0274	0	0	0.109637	0	0.0731	0.0209066	0.0221493	0.0161551	0.013889	1.16946	211.3	0	5.80442	2.74	1600	10	0.838	1	1	1	1	2	0
0.358	0.5	700	2	5	0	1	0.0783	0.0081	0	0.0799549	0	0.02864	0.0114188	0.0114503	0.0028955	0.00297856	1.23	561	0.34	12	0.25	1600	10	0.79	1	0	0	0	0	0
0.36229	0.33	900	3	5	0	0	0	0	0	0.0873665	0	0.022	0.000484	0.00066	0.000286	0.02057	1.03518	141.6	0	19.718	1	1600	10	0.87	1	1	1	0	0	0
0.374261	12	950	1	5	0	0	0	0	0	0.036291	0	0.0526	0.0102044	0.0103254	0.0224497	0.009468	0.657323	98	1.71351	12.0495	1	1600	10	0.79	1	0	0	1	2	1
0.382322	0.5	800	3	5	0	1	0.0063	0	0	0.088	0	0.0148	0.005254	0	0.009546	0	0.74	246.4	0.302212	7.88406	0.15	1600	10	0.85	1	1	1	0	0	0
0.39	0.484894	800	2	5	0	0	0	0	0	0.111898	0	0.0453	0.0137259	0.0088788	0.0141336	0.0085617	1.38	483.7	0.12785	3.72358	0.5	1600	10	0.823	1	1	1	1	2	0
0.4	0.5	700	2	5	0	0	0.015	0	0	0.127	0	0.075	0.0290925	0.0153375	0.008685	0.021885	1.02	372.9	0.166185	4.3	1	1600	10	0.9	1	1	1	0	0	0
0.404	1.17962	900	0.5	5	0	0	0	0	0	0.0433039	0	0.0875	0.0273	0.020475	0.0244125	0.0153125	0	1277	4.35	15.3818	0.5	1600	10	0.86	1	1	1	1	2	1
0.434256	1.3	900	1	5	0	0	0	0.0061	0	0	0.004	0.0538	0.0214501	0	0.0323499	0	0.996	731.44	1.49667	11.1951	0.8	1600	5	0.916	1	1	1	1	2	1
0.4512	1	800	2	5	0	0	0	0	0	0.0646633	0	0.0186	0.0034968	0.002976	0.0033108	0.0088164	0.846056	468	0.45	17.1682	0.49	1600	5	0.8	1	1	0	0	0	0
0.46	0	900	2	5	0	1	0	0.0068	0	0.0537	0	0.028	0.0077392	0.0044296	0.01078	0.0050512	0	551.86	1.50851	8.64209	0.25	1600	10	0.845	1	1	1	1	2	0
0.46	0.429	700	2	5	0	0	0	0.0256	0	0.0148	0	0.0157	0.00390381	0.00391165	0.00392641	0.00395938	1.21	130.6	2.1	50.3	0.23	1600	10	0.933	1	1	1	0	0	0
0.47	3.64038	550	4	5	0	0	0	0	0	0.0442899	0	0.0612	0.0158508	0.011322	0.0228888	0.0111384	0	91.2	1.7936	13.8551	1	1600	10	0.8	1	1	0	1	2	1
0.482	0.583	900	3	5	0	1	0.005	0	0	0.072	0.006	0.013	0.0051753	0.0051857	0.002639	0	0.8125	1348	0.5	10	0.4	1600	5	0.8	1	1	0	0	0	0
0.57425	1.41	800	2	5	0	0	0	0	0	0.0887127	0.09	0.09	0.03366	0.02673	0.02961	0	1.38	512.6	0.525495	10.3569	0.5	1600	5	0.871	1	1	1	1	2	1
0.586	0.428	700	2	5	0	0	0.07891	0	0	0.05302	0	0.07806	0.0317236	0.0269307	0.0187968	0.000608868	0	813.69	2.43	26.2	0.2	1600	10	0.82	1	1	1	1	2	0
0.603	1.12733	800	2	5	0	0	0	0	0.015	0.00088	0	0.0454	0.00289652	0.0306405	0.011863	0	0.687315	155.6	0.405	19.9112	0.5	1600	10	0.84	1	1	1	1	2	0
0.99	0.975906	900	2	5	0	0	0	0.003	0	0.0475063	0	0.0397	0.0106396	0.0086943	0.0133392	0.0072651	0	1060	1.57789	7.54541	0.3	1600	10	0.833	1	1	1	1	2	0
0.014	0.518059	700	2	5.0629	0	0	0	0	0	0.083654	0	0.0502	0.0147638	0.00147588	0.0339603	0	0.923664	1199.3	0	6.8397	0.2	1600	10	0.78	1	0	0	1	2	1
0	0.7	900	4	5.15657	1	0	0	0	0	0.033	0	0.036	0.014364	0.003618	0.014454	0.0035496	0.84	488	2	5	0.26	900	10	0.83	1	1	1	1	2	0
0.493034	1	1000	2	5.30601	0	1	0	0	0	0.076948	0	0.0255	0.0103275	0.009741	0	0.0054315	0.896	93	0.500454	10.68	0.1	1600	5	0.7	0	0	0	0	0	0
0.226931	0.333333	800	2	5.42358	0	0	0	0	0	0.0912669	0	0.058	0.018	0.004	0.036	0	0.888772	934.8	0.154037	5.88227	0.0156	1600	10	0.82	1	1	1	1	2	1
0.254169	0.47	900	2	5.49527	0	0	0	0	0	0.0928437	0	0.0638	0.0266046	0.0140998	0.0230956	0	0.979655	527.7	0	6.46287	0.4	1600	10	0.8	1	1	0	1	2	1
0.26	0.746879	800	2	5.66386	0	0	0.0058	0.0129	0	0.0373763	0.00918	0.0397	0.00155624	0.00157609	0.0365677	0	0.820816	1005.62	1.26938	17.5545	5.23	1600	10	0.89	1	1	1	1	2	1
0.350929	0.12	1000	2	5.69728	0	0	0	0	0	0.0951042	0	0.06	0.023	0.005	0.026	0	0.89	188	0.259644	8.91937	0.02	1625	20	0.78	1	0	0	1	2	1
0.1	0.656669	900	1	6.06578	0	0	0	0	0	0.0840022	0	0.071	0.0639	0.00355	0.00355	0	0.921772	1150	0.36	9.26866	0.5	1600	10	0.7	0	0	0	0	0	0
0.43	0.591357	950	2	6.06921	0	1	0	0	0	0.1517	0.0262	0.0326	0.005216	0.00585496	0.0182332	0.00329912	0.95	561	0.30395	3.36	0.46	1600	10	0.86	1	1	1	1	2	0
0	0.12	800	3	6.20935	0	0	0	0	0	0.0460185	0	0.0721	0.0110313	0.0154294	0.0456393	0	0	1631	1.37533	13.2998	0.2	1600	5	0.77	0	0	0	1	2	1
0.326736	2	450	1	6.38353	0	0	0	0	0	0.0583485	0	0.0106	0.0030952	0.0061904	0	0.0013038	0.736713	1717.8	0.48	21.5845	0.79	1600	10	0.8	1	1	0	0	0	0
0.335051	2.5	1000	3	6.53558	0	0	0	0	0	0.0523017	0	0.0858	0.048048	0.011583	0.00119262	0.024882	0.9	169.3	1.78135	15.9462	0.198	1600	50	0.7	0	0	0	0	0	0
0	0.5	890	2	6.54831	0	0	0	0	0	0.0458392	0	0.00125	0.0003025	0.00010625	0.0006175	0.00022375	1.3	1230	1.2779	22.4278	0.943	1600	5	0.77	0	0	0	0	0	0
0.354629	0.46	1000	2	6.69655	0	0	0	0	0	0.101114	0	0.024	0.012264	0.005928	0.005568	0.00024	0.926709	377	0	7.15405	0.141	1600	10	0.87	1	1	1	0	0	0
0.33	1.43565	950	1	6.76477	0	0	0	0	0	0.0396739	0	0.071	0.061486	0	0	0.009514	0.729786	510	2.7	10.7754	0.47009	1600	10	0.838	1	1	1	0	0	0
0	0.4	200	12	7.07752	0	1	0	0	0	0.1024	0	0.0087	0.00125541	0.00479979	0.00118581	0.00145899	1.29	0	0.642977	27.8614	0.25	1600	10	0.77	0	0	0	0	0	0
0.248194	0.5	150	3	7.36184	0	0	0	0	0	0.0829887	0.0314	0.0132	0.0015048	0.005742	0.0059664	0	0.848166	121	0.659349	27.504	0.3178	1600	50	0.71	0	0	0	0	0	0
0	0.672	800	2	7.91155	0	0	0	0	0	0.02867	0	0.0285	0.0113458	0.0114199	0.0051357	0.0005985	0.83	249.53	1.64	27.3	0.21	1600	10	0.85	1	1	1	0	0	0
0.413	0.23	737.661	2	9.07819	0	0	0.041	0	0	0.0412231	0	0.03	0.01197	0.01209	0.006948	0	0.67	75.4	1.5	27	0.4	1600	10	0.77	0	0	0	0	0	0
0	0.881	800	1	10	0	0	0	0	0	0.093	0	0.0125	0.003125	0.005875	0.002125	0.001375	0.86	650	1.12	46.9	0.1963	1600	20	0.77	0	0	0	0	0	0
0	0.5	600	2	10	0	0	0	0	0	0.056	0	0.0933	0.0396525	0.020498	0.0331495	0	0	366	0.5	4	0.16	1600	10	0.82	1	1	1	1	2	1
0.167059	0.67	450	2	10	0	0	0	0	0	0.0235	0.0392	0.0072	0.0024336	0.0008424	0.0014184	0.0025056	0	469.3	1.08959	32.4465	0.5	1600	20	0.81	1	1	0	0	0	0
0.177545	0.375	1000	2	10	0	0	0	0	0	0.0364	0	0.0677	0.0150497	0.00397399	0.0376344	0.0110419	0.86	579	2.04737	4.3	2	1600	10	0.848	1	1	1	1	2	1
0.24	0.5	900	3	10	1	1	0	0.0025517	0	0.025	0	0.0106	0.00184864	0.00135574	0.00410856	0.00328706	0.71	281.8	1.43467	31.1122	1.01	1600	10	0.8	1	1	0	0	0	0
0.316056	4	680	6	10	0	0	0	0	0	0.0392608	0	0.051	0.015147	0.011628	0.015351	0.008874	0.866	299.4	1.98497	17.8377	0.43	1600	10	0.93	1	1	1	1	2	0
0.381359	0.166667	900	1	10	0	0	0	0.0013	0	0.1187	0	0.0195	0.00757575	0.00604695	0.0058773	0	0.87	278.6	0.298747	14.8558	0.1	1600	10	0.86	1	1	1	0	0	0
0.38556	0.2	700	2	10	1	1	0	0	0	0.0770895	0	0.0215	0.0104705	0.0069445	0.004085	0	0.73	15.1	0.486598	19.5007	0.199	1600	5	0.74	0	0	0	0	0	0
0.46	0.504042	900	4	10	0	0	0	0	0	0.095727	0	0.0546	0.0493584	0.0038766	0.001365	0	0.913865	535	0	14.1338	0.1	1600	10	0.845	1	1	1	0	0	0
1.25757	0.862404	800	2	10	0	0	0	0	0	0.0468013	0	0.081	0.030699	0.020412	0.029889	0	1.01	360.2	1.54884	14.408	0.04	1600	10	0.75	0	0	0	1	2	1
0.27	0.32	950	2	10.5943	0	0	0	0.058	0	0.031	0	0.081	0.011745	0.008343	0.032481	0.028431	1.1	292	3.8	80.4	0.495	1600	10	0.8	1	1	0	1	2	1
0.48	0.54	650	2	11.3682	0	1	0	0.002	0	0.0575231	0	0.03	0.012	0.006	0.00495	0.00684	1.6	75	1	52	0.243	1600	10	0.796	1	0	0	0	0	0
0.249108	0.83	1000	0.6	13.5701	0	0	0	0	0	0.0349542	0	0.0476	0.0117572	0.015946	0.0095676	0.0103292	0.567	1456.4	1.99134	33.9716	1	1600	10	0.822	1	1	1	0	0	0
0	0.77	1000	3	14.1898	0	0	0	0	0	0.026	0	0.032	0.0127552	0.0128352	0.0035456	0.002864	0	786	0.895	47.6	0.365	1600	10	0.77	0	0	0	0	0	0
0.619	0.436	1000	4	15.0623	0	0	0	0.0315	0	0.0307282	0	0.0375	0.0146175	0.0112425	0.0083775	0.0032625	1.07	500	1.98	50	0.565	1600	10	0.854	1	1	1	0	0	0
0.25	0.5	1000	2	20	0	1	0.0006	0	0	0.0061	0	0.0395	0.0111548	0.0079	0.0190548	0.0013904	0.91	337.45	1.63028	42.3974	1	1600	10	0.79	1	0	0	1	2	0
0.58	0.5	1000	1	20	0	0	0	0.0005	0	0.0799	0	0.0151	0.00468251	0.00205209	0.00526084	0.00310456	0.96	629.7	0.528738	32.8157	0.35	1600	10	0.9	1	1	1	0	0	0
0.62	0.89953	750	1	20	0	0	0	0	0	0.0731128	0	0.017	0.009962	0.003893	0.003145	0	0.901	475	0.6	33.66	0.32	1600	10	0.75	0	0	0	0	0	0
0.65	0.661793	950	3	25	0	0	0.0248	0.0196	0	0.0441581	0	0.0382	0.0180686	0.0201314	0	0	1.18	1132	1.42894	32.0727	0.5	1600	10	0.885	1	1	1	0	0	0
0	0.57	900	3	5	0	0	0	0	0	0	0	0.0314	0.0124	0.0125	0.0064	0	1.08	565.1	1.63	5	0.256	1600	10	0.85	0	0	1	0	0	0
0	0.386	1000	3	6	0	1	0	0	0.0231	0.0428	0	0.025	0.00745	0.00764	0.0077	0.0022	0.95	134.7	1.35	5.36	0.524	1600	5	0.78	1	0	0	0	0	0
0	0.673	800	1	6	0	0	0	0	0	0.023	0	0.035	0.0108	0.0078	0.003	0.0099	1.34	35.68	0.23	26.83	0.45	1600	5	0.909	0	0	1	0	0	0
0	0.46	900	3	5	0	1	0	0	0.0076	0	0	0.0372	0.01491	0.0106	0.0072	0.0045	1.16	3433.26	0.412	4.29	0.37	1600	10	0.82	0	0	1	0	0	0
0	0.586	850	1.5	10	0	0	0	0	0.0071	0	0.003	0.0543	0.0179	0.0211	0.0121	0.0032	1.17	1145	1.25	20	0.36	1600	10	0.78	1	0	0	1	2	0
0	0.643	800	2	6	0	1	0	0	0	0.0087	0	0.0573	0.0228	0.0229	0.0116	0	0.93	978	0.891	8	0.19	1600	5	0.77	1	0	0	1	2	0
0	0.435	900	2	7	0	0	0	0	0	0.0291	0	0.0348	0.0125	0.0118	0.0063	0.0042	1.27	78.92	1.91	10.82	0.58	1600	10	0.9	0	0	1	0	0	0
0	0.681	700	2	5	1	0	0	0	0	0.031	0.002	0.048	0.0211	0.0106	0.0084	0.0079	1.12	391	0.93	22	0.339	900	5	0.75	1	0	0	0	0	0
0	0.749	900	2	7	0	1	0	0	0	0.0255	0	0.0304	0.0121	0.0122	0.0048	0.0014	0.97	911	0.78	13	0.4	1600	10	0.857	0	0	1	0	0	0
0	0.425	900	3	5	0	1	0	0	0	0.0068	0.0017	0.0224	0.0064	0.0069	0.0046	0.0045	0.88	891	0.51	10	0.43	1600	10	0.84	0	0	1	0	0	0
0	0.54	900	3	5	0	0	0	0	0	0.0099	0.0119	0.0275	0.0096	0.0097	0.0078	0.0005	0.78	699	2	5	0.2	1600	10	0.87	0	0	1	0	0	0
0	0.702	800	2	6	0	0	0	0	0.018	0.0242	0	0.0424	0.0142	0.0145	0.013	0.0008	0.71	752.6	1.78	32.5	0.46	1600	10	0.72	1	0	0	1	2	0
0	0.542	850	2	4	0	1	0	0	0.0102	0.0085	0	0.0252	0.0101	0.0051	0.0102	0	0.65	1406	0.996	6.1	0.32	1600	5	0.83	0	0	1	1	2	0
0	0.45	800	1	6	0	0	0	0	0.0374	0.0218	0	0.0442	0.0115	0.0138	0.0163	0.0026	0.72	150.6	0.78	54	0.28	1600	5	0.74	1	0	0	1	2	0
0	0.683	1000	3	6	0	0	0	0	0	0.0102	0	0.03988	0.0099	0.008	0.0101	0.0119	1.45	1145	2	50	0.25	1600	10	0.87	0	0	1	1	2	0
0	0.725	800	2	5	0	1	0	0	0	0.0259	0	0.0448	0.0167	0.0119	0.0137	0.0026	1.09	630	0.706	44.38	0.52	900	5	0.77	1	0	0	1	2	0
0	0.43	950	2	4	0	0	0	0	0.002	0.0061	0	0.052	0.0207	0.0104	0.0105	0.0104	1.03	354	0.19	37	0.6	1600	10	0.85	0	0	1	1	2	0
0	0.62	700	2	5	0	0	0	0	0	0.024	0	0.0624	0.0262	0.0155	0.0119	0.0087	0.83	796	1.32	10.2	0.386	1600	10	0.72	1	0	0	1	2	0
0	0.536	900	3	5	1	1	0	0	0.006	0	0	0.037	0.0147	0.0093	0.0051	0.0071	1.04	514	1.2	51.4	0.45	900	5	0.8	0	1	0	0	0	0
0	0.472	800	2	6	0	0	0	0	0	0.0067	0.0079	0.0671	0.0241	0.0282	0.0094	0.0054	1.11	794.3	2.3	43.2	0.571	1600	10	0.86	0	0	1	0	0	0
0	0.543	1000	3	6	1	1	0	0	0	0.01125	0	0.0483	0.0167	0.0144	0.0094	0.0076	0.91	398	1	25	0.235	1600	10	0.887	0	0	1	0	0	0
0	0.56	700	3	4	0	1	0	0	0.01325	0.035	0	0.056	0.0159	0.0223	1.62	0.0016	1.042	1775.47	2	20	0.306	1600	10	0.8	0	1	0	1	2	1
0	0.429	1100	3	7	0	0	0	0	0	0.0123	0	0.0492	0.0196	0.0103	0.0116	0.0077	0.83	1373.03	1.23	34.2	0.33	900	5	0.77	1	0	0	1	2	0
0	0.62	900	3	5	0	0	0	0	0.0054	0.0032	0.06	0.0476	0.0138	0.0141	0.0162	0.0035	1.02	431.6	0.5	29.7	0.29	1600	10	0.87	0	0	1	1	2	0
0	0.685	900	2	7	0	1	0	0	0.0219	0.0255	0.0258	0.0304	0.0093	0.0061	0.0088	0.0062	1.62	169.4	1.866	30	0.36	1600	5	0.75	1	0	0	0	0	0
0	0.53	800	2	5	0	0	0	0	0.0049	0	0	0.043	0.0142	0.0108	0.0099	0.0082	1.23	346.8	1.72	25.3	0.42	1600	10	0.83	0	0	1	0	0	0
0	0.521	900	2	7	0	1	0	0	0	0.0066	0.0061	0.036	0.0119	0	0.0205	0.0036	1.06	1656	2	44	0.5	1600	5	0.88	0	0	1	1	2	1
0	0.741	800	1.5	5	1	0	0	0	0.0084	0.0126	0.0098	0.0462	0.0112	0.013	0.0146	0.0075	0.86	793	1.02	30.4	0.258	900	5	0.74	1	0	0	1	2	0
0	0.57	900	3	5	0	0	0	0	0.0111	0	0	0.0384	0.0128	0.0101	0.0056	0.0099	1.11	706.5	1.8	12.5	0.392	1600	10	0.83	0	0	1	0	0	0
0	0.693	700	2	5	0	0	0	0	0	0.011	0.0328	0.0232	0.0062	0.0071	0.0044	0.0055	1.06	236.8	0.61	7.92	0.472	1600	5	0.772	1	0	0	0	0	0
0	0.49	800	2	6	0	0	0	0	0	0.0381	0	0.0546	0.0185	0.0193	0.011	0.0059	0.859	109.7	1.848	20	0.796	1600	10	0.87	0	0	1	1	2	0
0	0.528	1000	3	6	0	0	0	0	0	0.0192	0.0181	0.0249	0.0079	0.0068	0.006	0.0043	1.125	66.03	1.416	8.33	0.435	1600	10	0.76	1	0	0	0	0	0
0	0.71	800	1	10	0	1	0	0	0	0.0159	0	0.0757	0.0282	0.0233	0.0092	0.015	0.96	183.8	1.16	14.81	0.52	1600	10	0.826	0	0	1	0	0	0
0	0.524	900	2	7	0	1	0	0	0	0.027	0	0.0396	0.0104	0.0128	0.0116	0.0049	0.84	1486.6	2.4	45	0.36	900	10	0.77	1	0	0	1	2	0
0	0.63	1000	3.5	5	1	1	0	0	0	0.0344	0	0.0304	0.0092	0.0073	0.008	0.0059	1.68	723	1.32	11.64	0.5	1600	10	0.85	0	0	1	0	0	0
